# Supplementary material for: Hierarchical nanosheet-based NiMoO4 nanotubes: synthesis and high supercapacitor performance
Source: Royal Society of Chemistry journal article supplement (doi:10.1039/c4ta05468g), 2014-11-10
Supplement: c4ta05468g1.pdf [file c4ta05468g1.pdf]

## Electronic Supplementary Information

### Hierarchical nanosheet-based NiMoO<sub>4</sub> nanotubes: Synthesis and high supercapacitor performance†

Zhuoxun Yin,<sup>a</sup> Shen Zhang,<sup>a</sup> Yujin Chen,<sup>\*a</sup> Peng Gao,<sup>\*b</sup> Chunling Zhu,<sup>b</sup> Piaoping Yang,<sup>\*b</sup> Lihong Qi<sup>a</sup>

<sup>a</sup> Key Laboratory of In-Fiber Integrated Optics, Ministry of Education, and College of Science, Harbin Engineering University, Harbin 150001, China. Fax: 86-451-82519754; Tel: 86-451-82519754; E-mail: [chenyujin@hrbeu.edu.cn](mailto:chenyujin@hrbeu.edu.cn)

<sup>b</sup> College of Materials Science and Chemical Engineering, Harbin Engineering University, Harbin, 150001, China.

E-mail: [gaopeng@hrbeu.edu.cn](mailto:gaopeng@hrbeu.edu.cn), and [yangpiaoping@hrbeu.edu.cn](mailto:yangpiaoping@hrbeu.edu.cn)

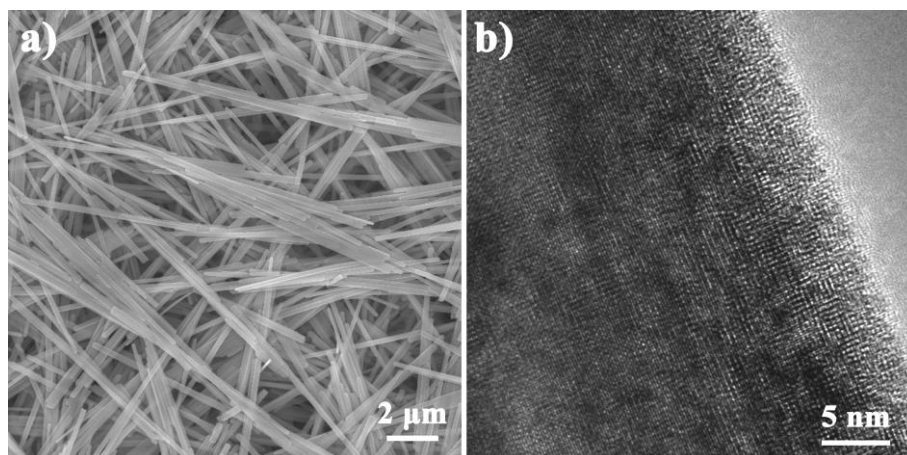

**Figure S1.** SEM and TEM images of MoO<sub>3</sub> nanorods.

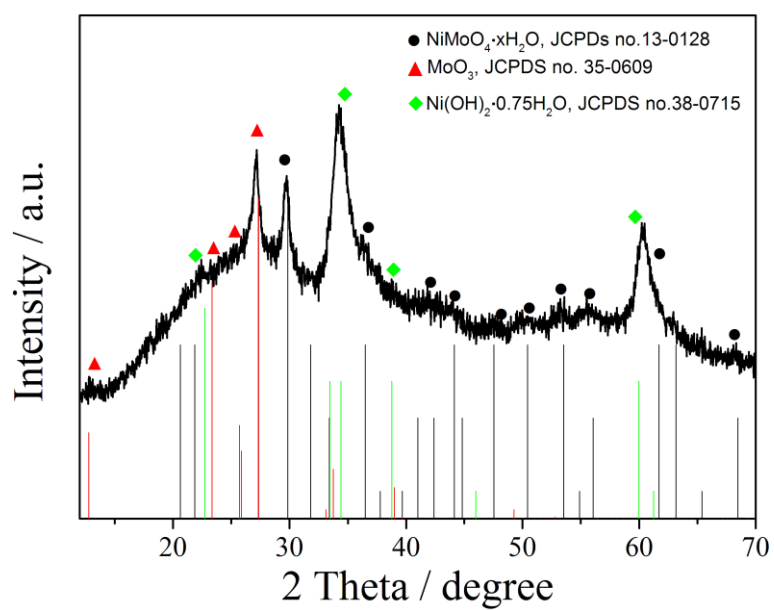

**Figure S2.** XRD pattern of the 3D precursors

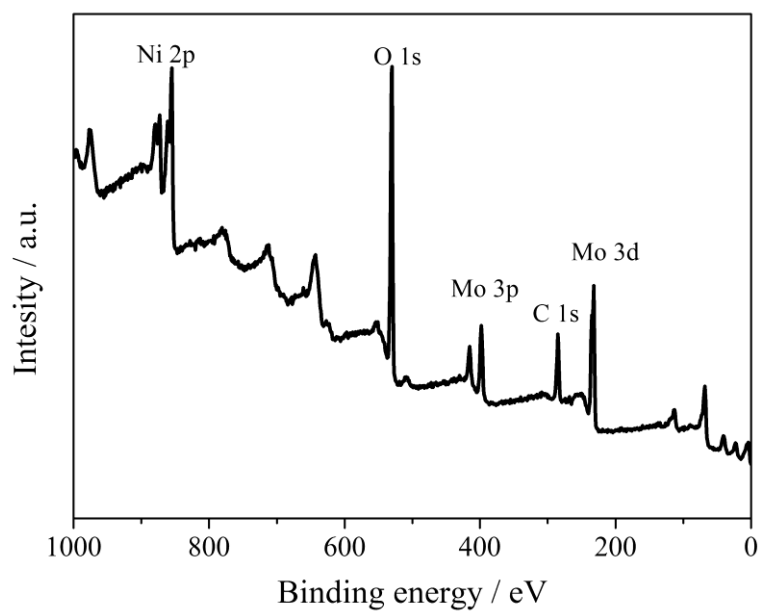

**Figure S3.** XPS survey spectra of the 3D precursors

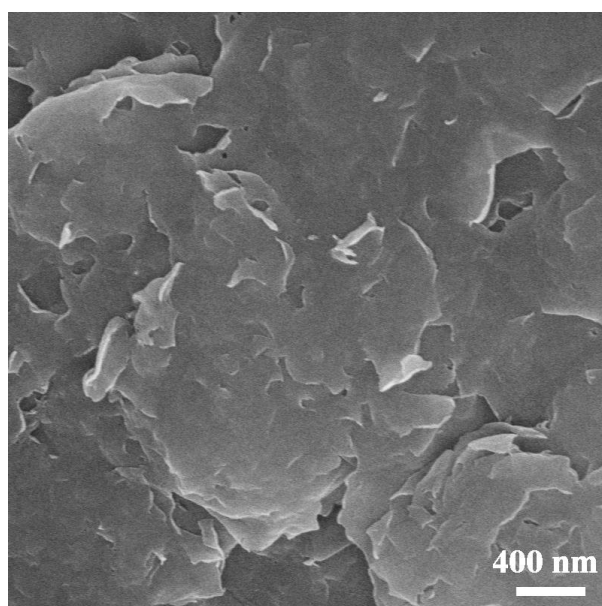

**Figure S4.** SEM image of the products without  $\text{MoO}_3$  in the reaction system

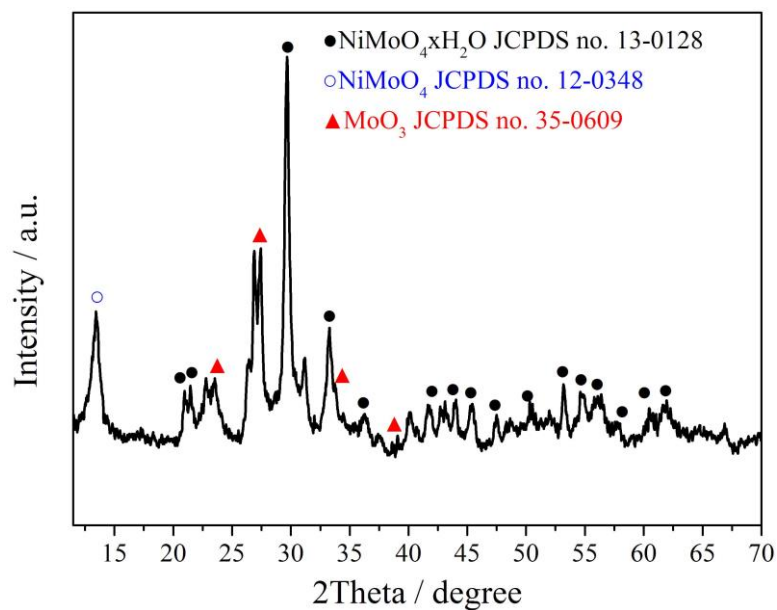

**Figure S5.** XRD pattern of the precipitate formed after the solution that obtained in water system aged at room temperature for above 4 h.

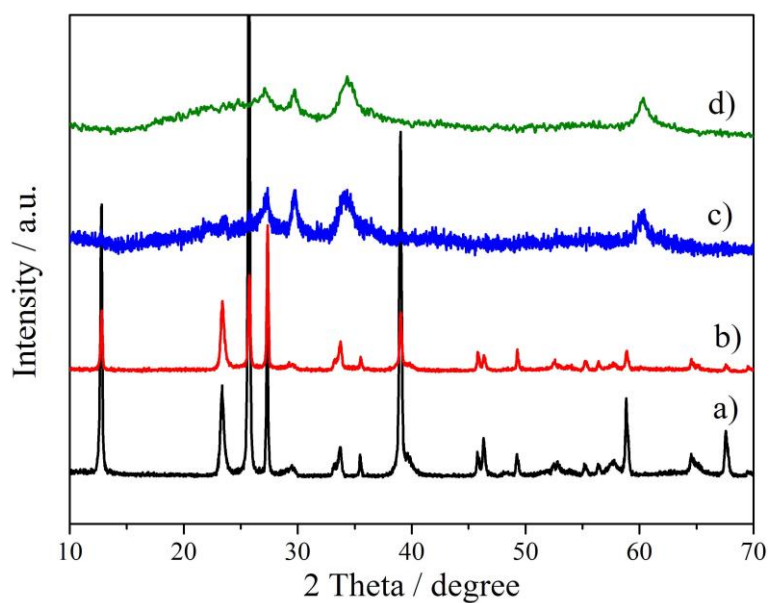

**Figure S6.** XRD pattern of the products obtained at different reaction stages. a) 70°C for 10 min., b) 90°C for 10 min., c) 90°C for 2 h, and d) 90°C for 5 h.

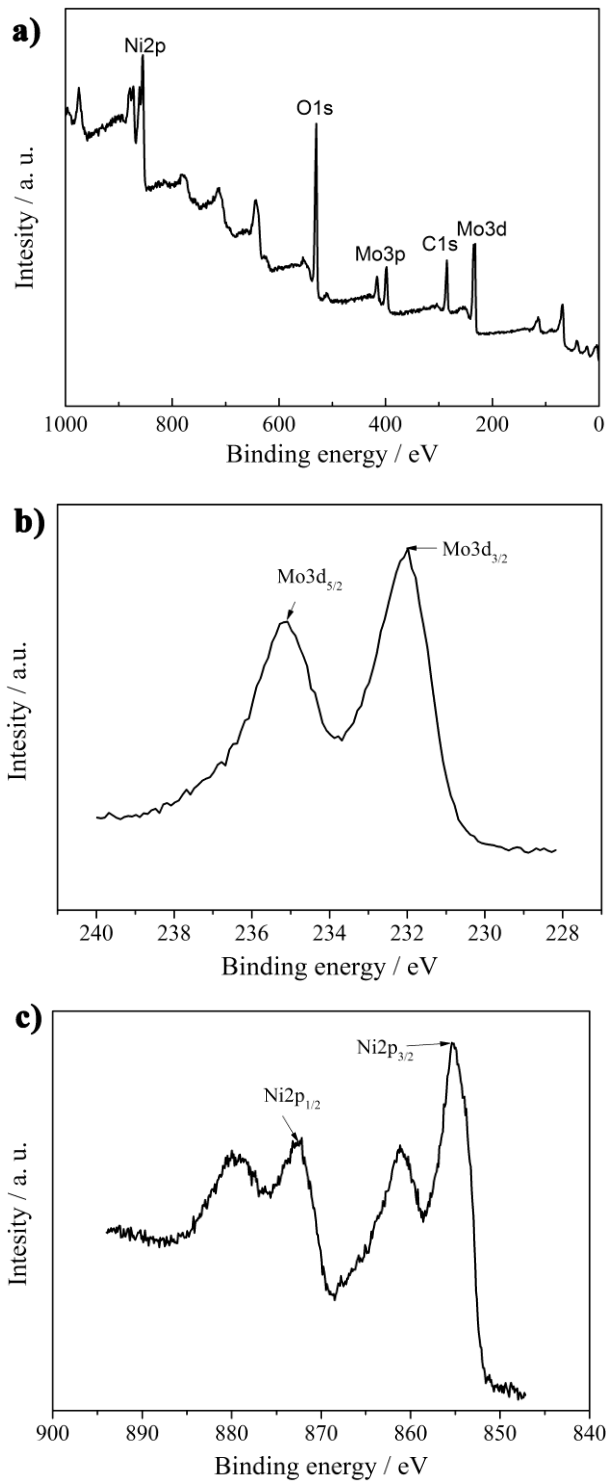

**Figure S7** a) XPS survey spectrum of the hierarchical nanosheet-based NiMoO<sub>4</sub> nanotubes, b) Mo 3d spectrum, and c) Ni 2p spectrum.

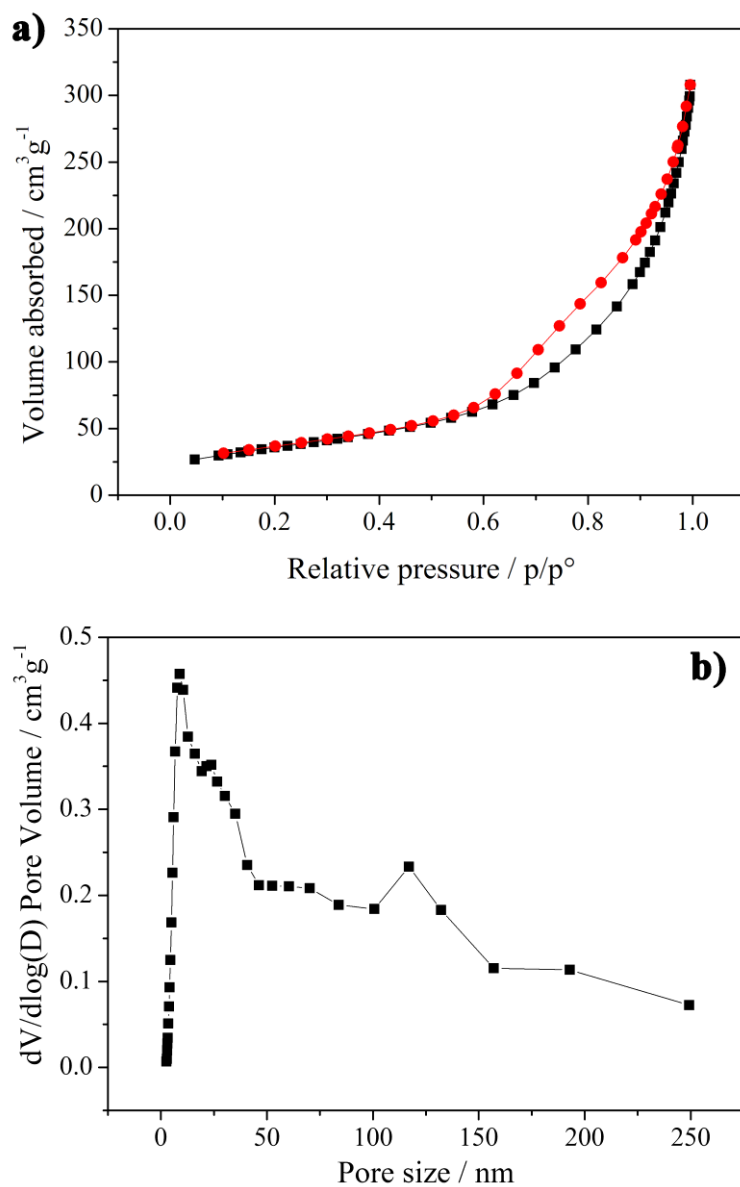

**Figure S8** a) (a) Nitrogen adsorption and desorption isotherms and (b) the corresponding pore-size distribution calculated by BJH method from the desorption branch of hierarchical nanosheet-based NiMoO<sub>4</sub> nanotubes.
